# Supplementary material for: SARS-CoV-2 ferritin nanoparticle vaccines produce hyperimmune equine sera with broad sarbecovirus activity
Source: PubMed Central journal article supplement — iScience. 2024 Aug 23;27(10):110624. doi: 10.1016/j.isci.2024.110624 (PMC11440237; doi:10.1016/j.isci.2024.110624), 2024-08-23
Supplement: mmc1.pdf [file mmc1.pdf]

## **Supplemental information**

### **SARS-CoV-2 ferritin nanoparticle vaccines produce hyperimmune equine sera with broad sarbecovirus activity**

**Elizabeth J. Martinez, William C. Chang, Wei-Hung Chen, Agnes Hajduczki, Paul V. Thomas, Jaime L. Jensen, Misook Choe, Rajeshwer S. Sankhala, Caroline E. Peterson, Phyllis A. Rees, Jordan Kimner, Sandrine Soman, Caitlin Kuklis, Letzibeth Mendez-Rivera, Vincent Dussupt, Jocelyn King, Courtney Corbett, Sandra V. Mayer, Aldon Fernandes, Kripa Murzello, Tres Cookenham, Janine Hvizdos, Larry Kummer, Tricia Hart, Kathleen Lanzer, Julian Gambacurta, Matthew Reagan, Debbie Duso, Sandhya Vasan, Natalie D. Collins, Nelson L. Michael, Shelly J. Krebs, Gregory D. Gromowski, Kayvon Modjarrad, John Kaundinya, and M. Gordon Joyce**

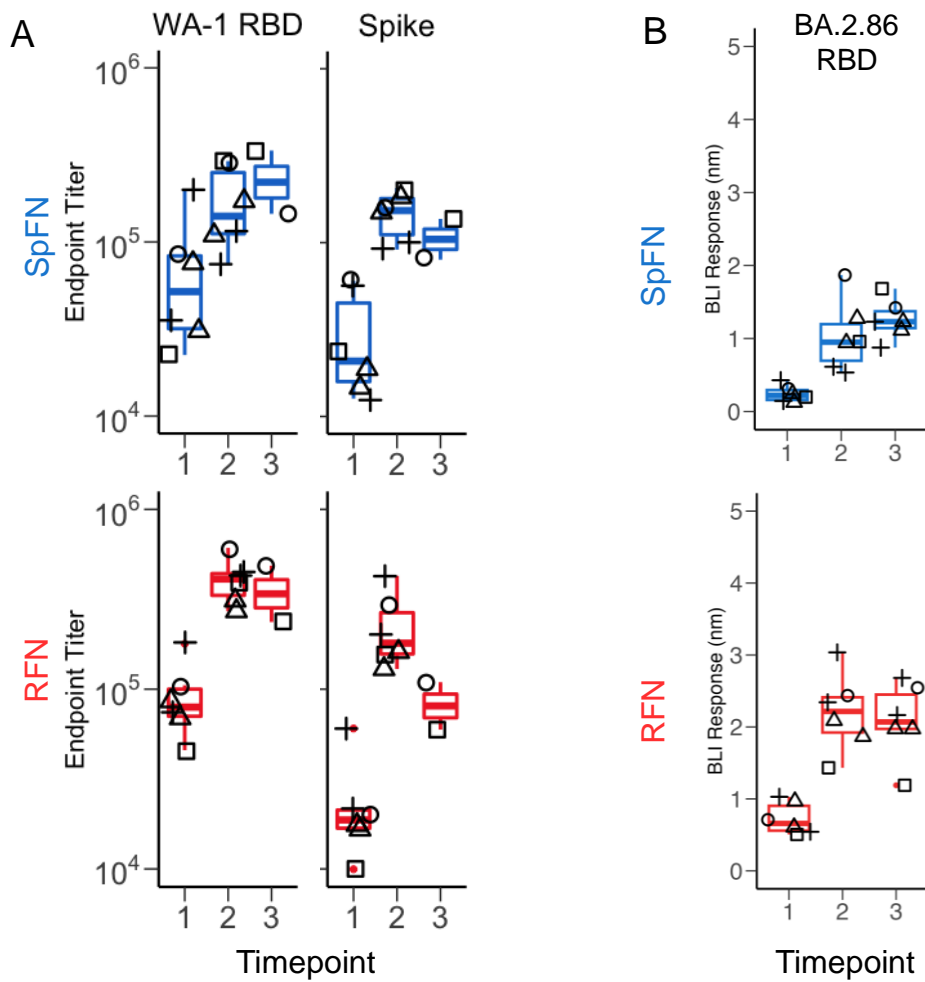

**Figure S1. Antigen binding responses elicited in the equine model, Related to Figure 1.**

(A) SARS-CoV-2 WA-1 RBD and Spike binding measured by ELISA. (top: SpFN immunized group (blue), bottom: RFN immunized group (red)). Symbols are matched to the immunization schema shown in Fig. 1B.

(B) SARS-CoV-2 Omicron BA.2.86 RBD binding levels measured by BLI. SpFN immunized group (blue), RFN immunized group (red). Symbols are matched to the immunization schema shown in Figure 1.

A

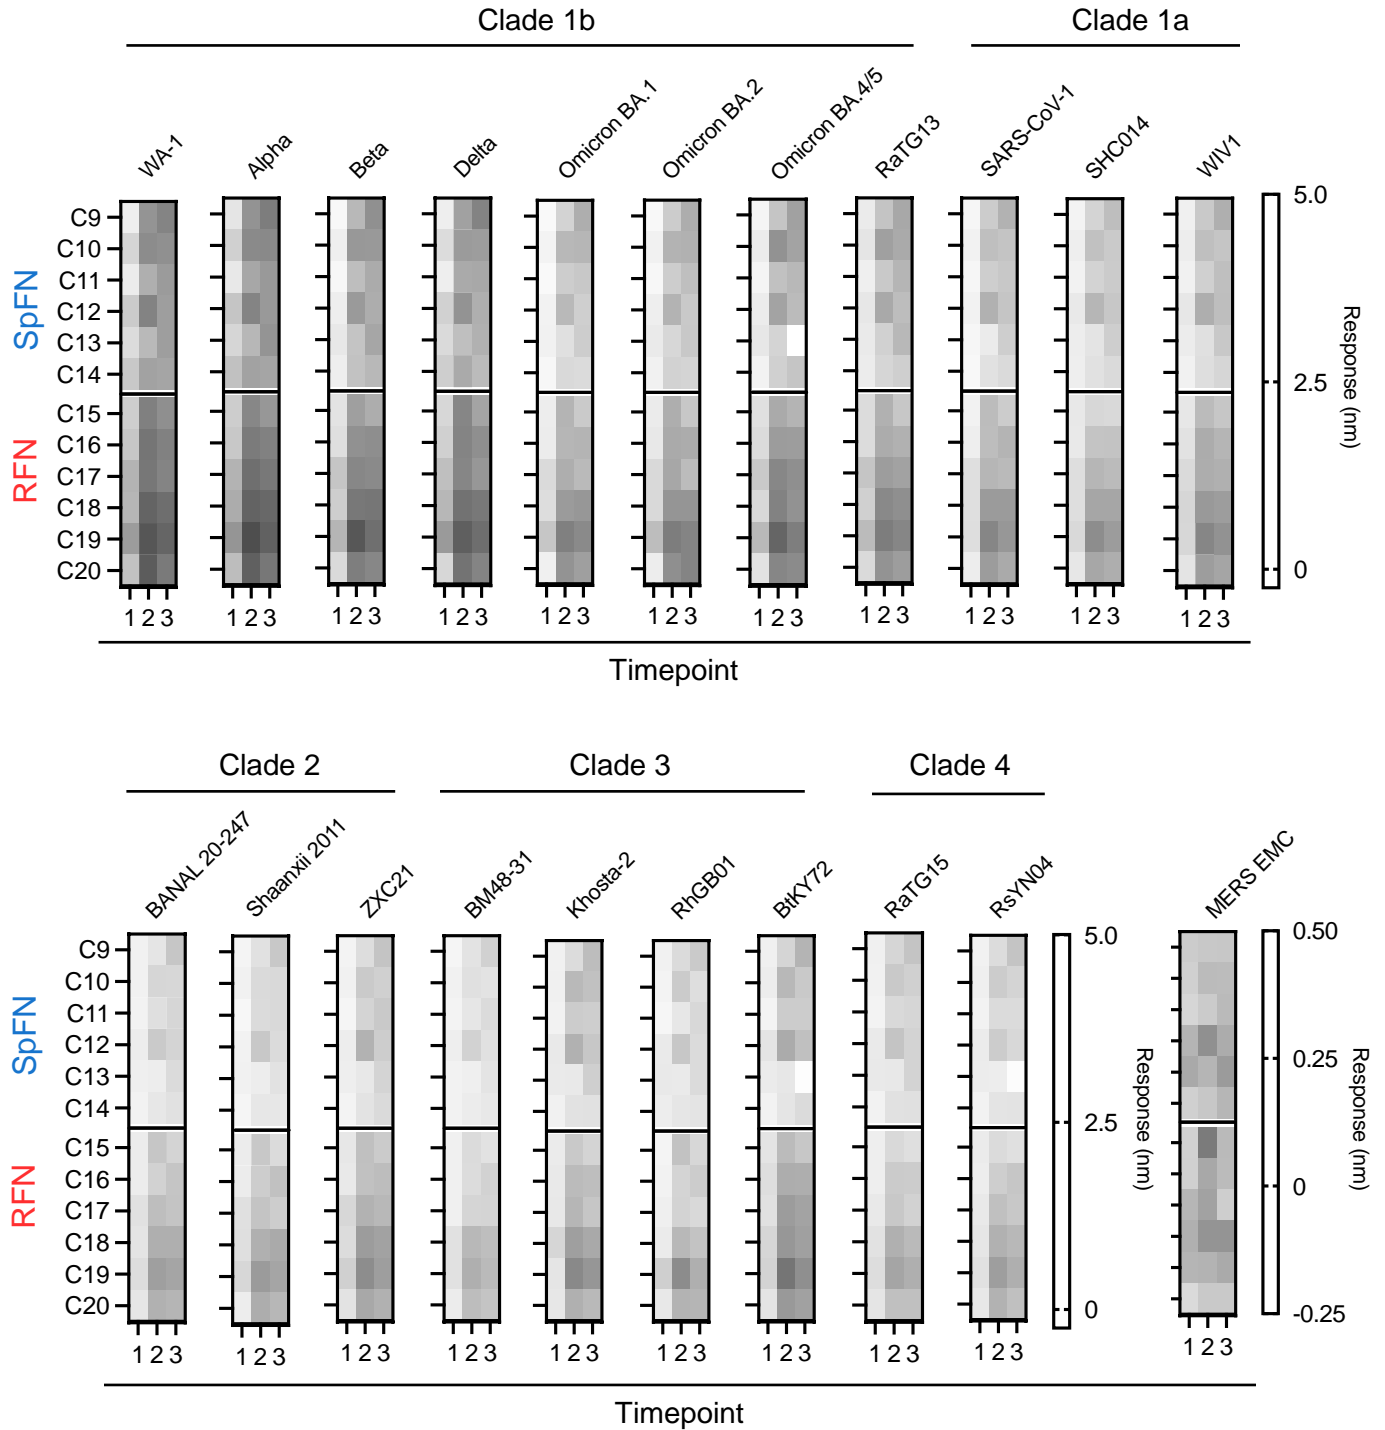

**Figure S2.** BLI binding responses for individual animal sera to a sarbecovirus and MERS RBD panel following immunization (1<sup>st</sup>, 2<sup>nd</sup>, and 3<sup>rd</sup> dose), Related to Figure 1 and Figure 3. Timepoints are indicated on the X-axis.

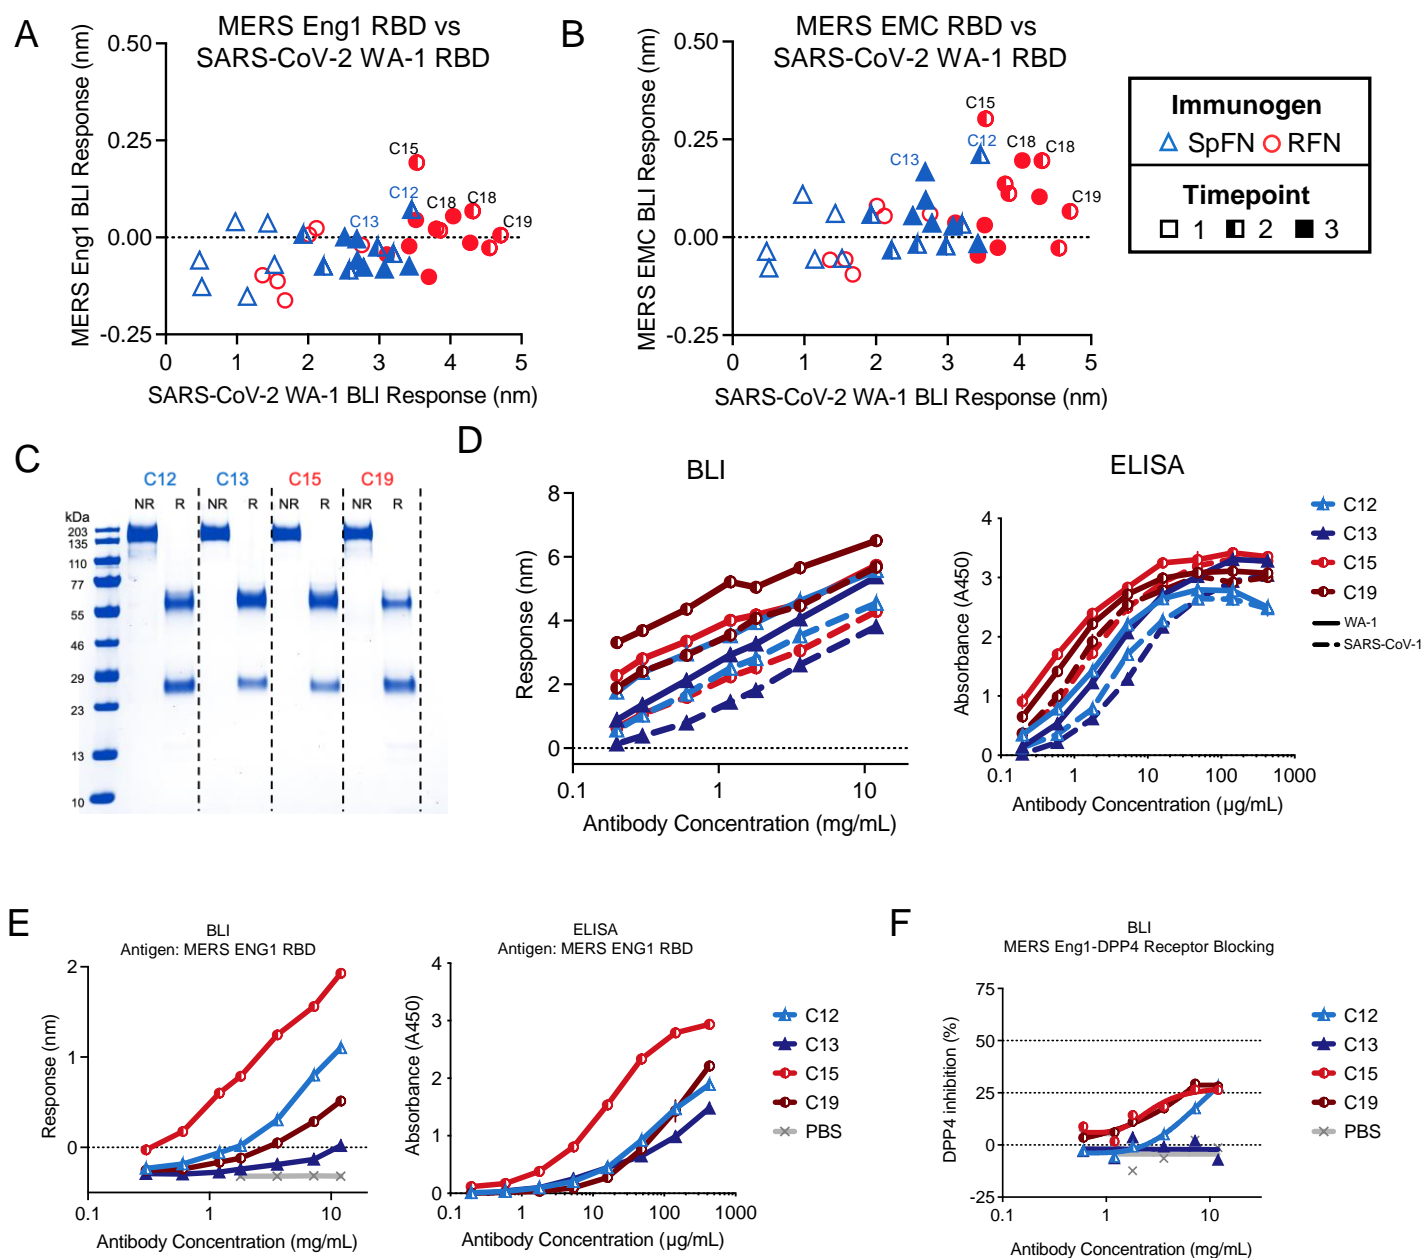

**Figure S3. Purified equine IgG binding responses, Related to Figure 3.**

(A-B) Serum binding response to MERS EMC and Eng1 RBDs and SARS-CoV-2 WA-1 RBD (A) MERS Eng1 RBD and (B) MERS EMC RBD; SpFN immunized group (blue) and RFN immunized group (red).

(C) SDS-PAGE of purified polyclonal IgG in both non-reducing (NR) and reducing (R) conditions for four animal sera samples. SpFN immunized samples are C12 and C13 and RFN immunized samples are C15 and C19.

(D) Binding responses of purified polyclonal IgG to SARS-CoV-2 WA-1 RBD (solid line) and SARS-CoV-1 Urbani RBD (dashed line). Responses measured by BLI (left) and ELISA (right).

(E) Binding responses of purified IgG measured by BLI (left) and ELISA (right).

(F) Assessment of purified equine polyclonal IgG for human DPP4-RBD blocking capability.

**Table S1. Immunization study design, Related to Figure 1.**

This study was an unblinded randomized control study, with six horses per immunogen, SpFN and RFN

| Group | N= No. of Horses | Animal Identifier | Treatment            | Vaccine Dose (mg) | Immunization Schedule |
|-------|------------------|-------------------|----------------------|-------------------|-----------------------|
| 1     | 1                | C9                | SpFN_1B-06-PL        | 150               | Weeks 0, 3, 6         |
| 2     | 1                | C12               | SpFN_1B-06-PL        | 500               | Weeks 0, 3, 6         |
| 3     | 2                | C10, C11          | SpFN_1B-06-PL        | 150               | Weeks 0, 4, 8         |
| 4     | 2                | C13, C14          | SpFN_1B-06-PL        | 500               | Weeks 0, 4, 8         |
| 5     | 1                | C15               | RBD-Ferritin_pCoV131 | 150               | Weeks 0, 3, 6         |
| 6     | 1                | C18               | RBD-Ferritin_pCoV131 | 500               | Weeks 0, 3, 6         |
| 7     | 2                | C16, C17          | RBD-Ferritin_pCoV131 | 150               | Weeks 0, 4, 8         |
| 8     | 2                | C19, C20          | RBD-Ferritin_pCoV131 | 500               | Weeks 0, 4, 8         |

**Table S2. SARS-CoV-2 WA-1 RBD and Spike ELISA binding titers, Related to Figure 1 and Figure 3.**

N.T.: not tested.

| Animal Identifier | Immunogen | Vaccine Dose (µg) | Immunization Schedule | Week 2  |        | Week 5/6* |         | Week 8/10* |         |
|-------------------|-----------|-------------------|-----------------------|---------|--------|-----------|---------|------------|---------|
|                   |           |                   |                       | RBD     | Spike  | RBD       | Spike   | RBD        | Spike   |
| C9                | SpFN      | 150               | Weeks 0, 3, 6         | 22,407  | 23,067 | 291,553   | 206,084 | 335,183    | 136,922 |
| C10               | SpFN      | 150               | Weeks 0, 4, 8         | 76,185  | 18,782 | 171,629   | 186,703 | N.T.       | N.T.    |
| C11               | SpFN      | 150               | Weeks 0, 4, 8         | 30,673  | 15,002 | 110,224   | 147,151 | N.T.       | N.T.    |
| C12               | SpFN      | 500               | Weeks 0, 3, 6         | 85,698  | 60,207 | 283,804   | 158,832 | 145,172    | 79,805  |
| C13               | SpFN      | 500               | Weeks 0, 4, 8         | 35,279  | 12,672 | 74,010    | 101,034 | N.T.       | N.T.    |
| C14               | SpFN      | 500               | Weeks 0, 4, 8         | 199,978 | 56,164 | 115,223   | 91,181  | N.T.       | N.T.    |

|     |     |     |               |         |        |         |         |         |         |
|-----|-----|-----|---------------|---------|--------|---------|---------|---------|---------|
| C15 | RFN | 150 | Weeks 0, 3, 6 | 45,780  | 9,964  | 395,984 | 155,760 | 236,386 | 59,564  |
| C16 | RFN | 150 | Weeks 0, 4, 8 | 69,764  | 16,637 | 313,564 | 160,912 | N.T.    | N.T.    |
| C17 | RFN | 150 | Weeks 0, 4, 8 | 85,977  | 17,485 | 270,875 | 129,427 | N.T.    | N.T.    |
| C18 | RFN | 500 | Weeks 0, 3, 6 | 105,137 | 20,053 | 610,557 | 291,996 | 486,492 | 109,321 |
| C19 | RFN | 500 | Weeks 0, 4, 8 | 178,805 | 60,421 | 424,121 | 201,893 | N.T.    | N.T.    |
| C20 | RFN | 500 | Weeks 0, 4, 8 | 73,403  | 21,686 | 444,655 | 427,060 | N.T.    | N.T.    |

**Table S3. RBD binding response by BLI (nm at 180s) at first timepoint , Related to Figure 1 and Figure 3.**

| Vaccine Dose (mg) | Immunization Schedule | Timepoint 1 |       |        |       |        |        |        |         |         |            |
|-------------------|-----------------------|-------------|-------|--------|-------|--------|--------|--------|---------|---------|------------|
|                   |                       | WA-1        | Alpha | Beta   | Delta | BA.1   | BA.2   | BA.4/5 | XBB.1.5 | BA.2.86 | SARS-CoV-1 |
| 150               | Weeks 0, 3, 6         | 0.472       | 0.523 | -0.062 | 0.233 | -0.095 | -0.057 | 0.038  | 0.178   | 0.198   | 0.002      |
| 150               | Weeks 0, 4, 8         | 1.146       | 1.145 | 0.215  | 0.771 | 0.082  | 0.135  | 0.289  | 0.268   | 0.245   | 0.116      |
| 150               | Weeks 0, 4, 8         | 0.507       | 0.431 | -0.028 | 0.224 | -0.085 | -0.035 | 0.051  | 0.098   | 0.126   | -0.014     |
| 500               | Weeks 0, 3, 6         | 1.433       | 1.474 | 0.248  | 1.086 | 0.107  | 0.234  | 0.305  | 0.356   | 0.310   | 0.114      |
| 500               | Weeks 0, 4, 8         | 0.976       | 0.973 | 0.408  | 0.824 | 0.154  | 0.351  | 0.427  | 0.464   | 0.428   | -0.007     |
| 500               | Weeks 0, 4, 8         | 1.526       | 1.575 | 0.229  | 1.183 | -0.018 | 0.136  | 0.122  | 0.212   | 0.145   | -0.064     |
| 150               | Weeks 0, 3, 6         | 1.359       | 1.234 | 0.55   | 0.9   | 0.255  | 0.321  | 0.651  | 0.551   | 0.506   | 0.116      |
| 150               | Weeks 0, 4, 8         | 1.572       | 1.368 | 0.685  | 1.115 | 0.282  | 0.417  | 0.797  | 0.666   | 0.607   | 0.22       |
| 150               | Weeks 0, 4, 8         | 2.119       | 2.021 | 1.436  | 1.599 | 0.815  | 0.862  | 1.33   | 0.901   | 0.969   | 0.683      |
| 500               | Weeks 0, 3, 6         | 2.014       | 2.217 | 1.187  | 1.859 | 0.739  | 0.863  | 0.873  | 0.660   | 0.711   | 0.677      |
| 500               | Weeks 0, 4, 8         | 2.754       | 2.908 | 1.897  | 2.711 | 1.401  | 1.684  | 1.793  | 1.492   | 1.030   | 0.693      |
| 500               | Weeks 0, 4, 8         | 1.678       | 1.711 | 0.832  | 0.92  | 0.172  | 0.257  | 0.582  | 0.412   | 0.543   | 0.251      |

**Table S4. RBD binding response by BLI (nm at 180s) at second timepoint , Related to Figure 1 and Figure 3.**

| Animal Identifier | Immunogen | Vaccine Dose (mg) | Immunization Schedule | Timepoint 2 |       |       |       |       |       |        |         |         |            |
|-------------------|-----------|-------------------|-----------------------|-------------|-------|-------|-------|-------|-------|--------|---------|---------|------------|
|                   |           |                   |                       | WA-1        | Alpha | Beta  | Delta | BA.1  | BA.2  | BA.4/5 | XBB.1.5 | BA.2.86 | SARS-CoV-1 |
| C9                | SpFN      | 150               | Weeks 0, 3, 6         | 2.973       | 2.961 | 1.812 | 2.485 | 1.032 | 1.236 | 1.435  | 0.876   | 0.957   | 1.234      |
| C10               | SpFN      | 150               | Weeks 0, 4, 8         | 3.196       | 3.238 | 2.743 | 2.674 | 1.832 | 1.961 | 2.925  | 1.686   | 1.276   | 1.621      |
| C11               | SpFN      | 150               | Weeks 0, 4, 8         | 2.215       | 2.377 | 1.630 | 2.218 | 1.209 | 1.206 | 1.556  | 0.813   | 0.942   | 1.176      |
| C12               | SpFN      | 500               | Weeks 0, 3, 6         | 3.454       | 3.417 | 2.688 | 2.915 | 1.786 | 1.965 | 2.438  | 1.966   | 1.869   | 2.030      |
| C13               | SpFN      | 500               | Weeks 0, 4, 8         | 1.930       | 1.881 | 1.471 | 1.621 | 0.645 | 0.896 | 1.003  | 0.819   | 0.534   | 0.333      |
| C14               | SpFN      | 500               | Weeks 0, 4, 8         | 2.574       | 2.522 | 1.533 | 2.229 | 0.842 | 1.045 | 1.101  | 0.785   | 0.613   | 0.623      |
| C15               | RFN       | 150               | Weeks 0, 3, 6         | 3.526       | 3.327 | 2.553 | 3.296 | 1.947 | 2.125 | 2.241  | 1.989   | 1.432   | 1.688      |
| C16               | RFN       | 150               | Weeks 0, 4, 8         | 3.851       | 3.690 | 2.960 | 3.334 | 1.885 | 2.222 | 2.638  | 1.628   | 1.867   | 1.675      |
| C17               | RFN       | 150               | Weeks 0, 4, 8         | 3.799       | 4.034 | 3.246 | 3.281 | 2.114 | 2.302 | 3.259  | 1.909   | 2.089   | 1.873      |
| C18               | RFN       | 500               | Weeks 0, 3, 6         | 4.311       | 4.404 | 3.701 | 3.875 | 2.669 | 2.857 | 3.406  | 2.521   | 2.436   | 2.655      |
| C19               | RFN       | 500               | Weeks 0, 4, 8         | 4.703       | 5.013 | 4.671 | 4.431 | 3.451 | 3.535 | 4.242  | 2.887   | 3.036   | 3.282      |
| C20               | RFN       | 500               | Weeks 0, 4, 8         | 4.549       | 4.482 | 3.519 | 3.851 | 2.901 | 3.015 | 3.276  | 2.997   | 2.343   | 2.637      |

**Table S5. RBD binding response by BLI (nm at 180s) at third timepoint, Related to Figure 1 and Figure 3.**

| Animal Identifier | Immunogen | Vaccine Dose (mg) | Immunization Schedule | Timepoint 3                        |       |       |       |       |       |        |         |         |            |
|-------------------|-----------|-------------------|-----------------------|------------------------------------|-------|-------|-------|-------|-------|--------|---------|---------|------------|
|                   |           |                   |                       | RBD binding response (nm at 180 s) |       |       |       |       |       |        |         |         |            |
|                   |           |                   |                       | WA-1                               | Alpha | Beta  | Delta | BA.1  | BA.2  | BA.4/5 | XBB.1.5 | BA.2.86 | SARS-CoV-1 |
| C9                | SpFN      | 150               | Weeks 0, 3, 6         | 3.421                              | 3.61  | 2.99  | 3.364 | 2.124 | 2.13  | 2.488  | 1.844   | 1.682   | 2.008      |
| C10               | SpFN      | 150               | Weeks 0, 4, 8         | 3.074                              | 3.262 | 2.739 | 2.613 | 1.873 | 2.02  | 2.428  | 1.340   | 1.113   | 1.458      |
| C11               | SpFN      | 150               | Weeks 0, 4, 8         | 2.779                              | 2.786 | 2.203 | 2.298 | 1.352 | 1.6   | 1.804  | 1.131   | 1.232   | 1.355      |
| C12               | SpFN      | 500               | Weeks 0, 3, 6         | 2.693                              | 2.784 | 2.137 | 2.09  | 1.138 | 1.318 | 1.739  | 1.693   | 1.420   | 1.44       |
| C13               | SpFN      | 500               | Weeks 0, 4, 8         | 2.685                              | 2.946 | 2.354 | 2.017 | 1.214 | 1.353 | -0.257 | 1.128   | 1.230   | 1.163      |
| C14               | SpFN      | 500               | Weeks 0, 4, 8         | 2.512                              | 2.434 | 1.808 | 1.727 | 0.783 | 0.989 | 1.437  | 1.107   | 0.875   | 0.821      |
| C15               | RFN       | 150               | Weeks 0, 3, 6         | 3.106                              | 2.838 | 2.155 | 2.414 | 1.296 | 1.388 | 1.93   | 1.813   | 1.190   | 1.223      |
| C16               | RFN       | 150               | Weeks 0, 4, 8         | 3.515                              | 3.501 | 3.047 | 3.01  | 1.923 | 2.158 | 2.6    | 2.055   | 1.974   | 1.936      |
| C17               | RFN       | 150               | Weeks 0, 4, 8         | 3.421                              | 3.767 | 3.163 | 2.771 | 1.774 | 1.715 | 3.032  | 2.276   | 1.973   | 1.752      |
| C18               | RFN       | 500               | Weeks 0, 3, 6         | 4.04                               | 4.247 | 3.752 | 3.682 | 2.78  | 2.856 | 2.92   | 2.843   | 2.545   | 2.676      |
| C19               | RFN       | 500               | Weeks 0, 4, 8         | 4.279                              | 4.466 | 3.972 | 3.997 | 3.174 | 3.345 | 3.527  | 2.981   | 2.682   | 2.794      |
| C20               | RFN       | 500               | Weeks 0, 4, 8         | 3.698                              | 3.793 | 3.243 | 3.343 | 2.562 | 3.343 | 3.143  | 2.461   | 2.165   | 2.227      |

**Table S6. Pseudovirus neutralization titers at first timepoint, Related to Figure 2.**

| Animal Identifier | Immunogen | Vaccine Dose (mg) | Immunization Schedule | Timepoint 1                              |        |        |       |        |       |         |            |       |
|-------------------|-----------|-------------------|-----------------------|------------------------------------------|--------|--------|-------|--------|-------|---------|------------|-------|
|                   |           |                   |                       | Neutralization ID50 (Dil <sup>-1</sup> ) |        |        |       |        |       |         |            |       |
|                   |           |                   |                       | WA-1                                     | Alpha  | Beta   | Delta | BA.1   | BA.5  | XBB.1.5 | SARS-CoV-1 |       |
| C9                | SpFN      | 150               | Weeks 0, 3, 6         | 1827                                     | 1126   | 358    | 778   | 40     | 40    | 40      | 193        |       |
| C10               | SpFN      | 150               | Weeks 0, 4, 8         | 3243                                     | 2734   | 633    | 3905  | 192    | 61    | 263     | 1156       |       |
| C11               | SpFN      | 150               | Weeks 0, 4, 8         | 1175                                     | 872    | 569    | 1459  | 230    | 40    | 40      | 220        |       |
| SpFN 150mg        |           |                   |                       | GMT                                      | 1909.4 | 1389.8 | 505.2 | 1642.7 | 120.9 | 46.0    | 74.9       | 366.1 |
| C12               | SpFN      | 500               | Weeks 0, 3, 6         | 4475                                     | 7109   | 445    | 4045  | 70     | 40    | 40      | 40         |       |
| C13               | SpFN      | 500               | Weeks 0, 4, 8         | 6442                                     | 2224   | 876    | 5580  | 60     | 40    | 40      | 161        |       |
| C14               | SpFN      | 500               | Weeks 0, 4, 8         | 4784                                     | 4128   | 284    | 3336  | 143    | 50    | 40      | 271        |       |
| SpFN 500mg        |           |                   |                       | GMT                                      | 5166.6 | 4026.2 | 480.2 | 4222.7 | 84.4  | 43.1    | 40.0       | 120.4 |
| C15               | RFN       | 150               | Weeks 0, 3, 6         | 360                                      | 150    | 40     | 275   | 40     | 40    | 40      | 40         |       |
| C16               | RFN       | 150               | Weeks 0, 4, 8         | 926                                      | 298    | 186    | 2427  | 40     | 40    | 40      | 57         |       |
| C17               | RFN       | 150               | Weeks 0, 4, 8         | 2853                                     | 3010   | 40     | 1080  | 40     | 40    | 40      | 40         |       |
| RFN 150mg         |           |                   |                       | GMT                                      | 983.4  | 512.4  | 66.8  | 896.6  | 40.0  | 40.0    | 40.0       | 45.0  |
| C18               | RFN       | 500               | Weeks 0, 3, 6         | 1703                                     | 3539   | 85     | 2654  | 329    | 40    | 40      | 40         |       |
| C19               | RFN       | 500               | Weeks 0, 4, 8         | 6524                                     | 5750   | 190    | 11589 | 111    | 118   | 40      | 969        |       |
| C20               | RFN       | 500               | Weeks 0, 4, 8         | 1797                                     | 1640   | 40     | 957   | 40     | 40    | 40      | 54         |       |
| RFN 500mg         |           |                   |                       | GMT                                      | 2712.8 | 3219.6 | 86.4  | 3087.6 | 113.5 | 57.4    | 40.0       | 127.9 |
| total             |           |                   |                       | GMT                                      | 2265.0 | 1743.1 | 193.4 | 2093.4 | 82.5  | 46.2    | 46.8       | 126.2 |

**Table S7. Pseudovirus neutralization titers at second timepoint, Related to Figure 2.**

| Animal Identifier | Immunogen | Vaccine Dose (mg) | Immunization Schedule | Timepoint 2                              |         |         |          |          |        |         |            |        |
|-------------------|-----------|-------------------|-----------------------|------------------------------------------|---------|---------|----------|----------|--------|---------|------------|--------|
|                   |           |                   |                       | Neutralization ID50 (Dil <sup>-1</sup> ) |         |         |          |          |        |         |            |        |
|                   |           |                   |                       | WA-1                                     | Alpha   | Beta    | Delta    | BA.1     | BA.5   | XBB.1.5 | SARS-CoV-1 |        |
| C9                | SpFN      | 150               | Weeks 0, 3, 6         | 31704                                    | 36723   | 5012    | 24326    | 3275     | 537    | 1764    | 4655       |        |
| C10               | SpFN      | 150               | Weeks 0, 4, 8         | 64079                                    | 22728   | 4998    | 46367    | 6148     | 353    | 1527    | 4403       |        |
| C11               | SpFN      | 150               | Weeks 0, 4, 8         | 12939                                    | 9533    | 3442    | 10320    | 1016     | 231    | 232     | 1500       |        |
| SpFN 150mg        |           |                   |                       | GMT                                      | 29733.3 | 19963.8 | 4417.8   | 22663.1  | 2734.9 | 352.5   | 854.5      | 3132.7 |
| C12               | SpFN      | 500               | Weeks 0, 3, 6         | 30237                                    | 16651   | 4423    | 35334    | 2241     | 984    | 1074    | 2808       |        |
| C13               | SpFN      | 500               | Weeks 0, 4, 8         | 12872                                    | 5169    | 3597    | 16196    | 484      | 40     | 114     | 790        |        |
| C14               | SpFN      | 500               | Weeks 0, 4, 8         | 27121                                    | 25000   | 5727    | 24060    | 919      | 218    | 178     | 1698       |        |
| SpFN 500mg        |           |                   |                       | GMT                                      | 21936.3 | 12910.1 | 4499.8   | 23968.0  | 998.9  | 204.7   | 279.6      | 1555.9 |
| C15               | RFN       | 150               | Weeks 0, 3, 6         | 20432                                    | 20515   | 1191    | 22019    | 526      | 194    | 165     | 412        |        |
| C16               | RFN       | 150               | Weeks 0, 4, 8         | 19782                                    | 20497   | 4301    | 46478    | 1339     | 179    | 1307    | 1241       |        |
| C17               | RFN       | 150               | Weeks 0, 4, 8         | 31412                                    | 11903   | 5192    | 30477    | 2443     | 190    | 1429    | 1529       |        |
| RFN 150mg         |           |                   |                       | GMT                                      | 23328.8 | 17105.6 | 2985.0   | 31477.9  | 1198.3 | 187.6   | 675.6      | 921.2  |
| C18               | RFN       | 500               | Weeks 0, 3, 6         | 17989                                    | 49841   | 3160    | 29410    | 3152     | 644    | 616     | 1274       |        |
| C19               | RFN       | 500               | Weeks 0, 4, 8         | 219097                                   | 163180  | 43463   | 96857    | 29747    | 12411  | 11767   | 13827      |        |
| C20               | RFN       | 500               | Weeks 0, 4, 8         | 90762                                    | 47499   | 5834    | 37831    | 5615     | 662    | 2022    | 4578       |        |
| RFN 500mg         |           |                   |                       | GMT                                      | 70987.6 | 72830.4 | 9288.047 | 47587.32 | 8074.7 | 1742.5  | 2447.3     | 4320.4 |
| total             |           |                   |                       | GMT                                      | 32238.2 | 23804.3 | 4845.2   | 30033.9  | 2267.5 | 391.9   | 792.8      | 2098.7 |

**Table S8. Pseudovirus neutralization titers at third timepoint, Related to Figure 2.**

| Animal Identifier | Immunogen | Vaccine Dose (mg) | Immunization Schedule | Timepoint 3                              |         |         |         |         |        |         |            |        |
|-------------------|-----------|-------------------|-----------------------|------------------------------------------|---------|---------|---------|---------|--------|---------|------------|--------|
|                   |           |                   |                       | Neutralization ID50 (Dil <sup>-1</sup> ) |         |         |         |         |        |         |            |        |
|                   |           |                   |                       | WA-1                                     | Alpha   | Beta    | Delta   | BA.1    | BA.5   | XBB.1.5 | SARS-CoV-1 |        |
| C9                | SpFN      | 150               | Weeks 0, 3, 6         | 207331                                   | 48007   | 25192   | 42799   | 12548   | 1349   | 4129    | 6838       |        |
| C10               | SpFN      | 150               | Weeks 0, 4, 8         | 37188                                    | 26847   | 10087   | 28975   | 6651    | 2713   | 1759    | 2805       |        |
| C11               | SpFN      | 150               | Weeks 0, 4, 8         | 14149                                    | 10474   | 5037    | 15772   | 4004    | 871    | 1298    | 1445       |        |
| SpFN 150mg        |           |                   |                       | GMT                                      | 47782.0 | 23810.6 | 10857.6 | 26943.1 | 6939.3 | 1471.7  | 2112.4     | 3026.3 |
| C12               | SpFN      | 500               | Weeks 0, 3, 6         | 16892                                    | 14241   | 4233    | 10851   | 4892    | 721    | 2204    | 2516       |        |
| C13               | SpFN      | 500               | Weeks 0, 4, 8         | 17401                                    | 15368   | 7467    | 15207   | 4319    | 161    | 917     | 2136       |        |
| C14               | SpFN      | 500               | Weeks 0, 4, 8         | 10088                                    | 16488   | 4774    | 16836   | 2759    | 200    | 583     | 1915       |        |
| SpFN 500mg        |           |                   |                       | GMT                                      | 14366.6 | 15338.2 | 5323.8  | 14057.8 | 3877.4 | 285.3   | 1056.0     | 2175.2 |
| C15               | RFN       | 150               | Weeks 0, 3, 6         | 7764                                     | 7323    | 1548    | 11647   | 1722    | 438    | 524     | 661        |        |
| C16               | RFN       | 150               | Weeks 0, 4, 8         | 13919                                    | 11313   | 6060    | 16381   | 3414    | 938    | 1773    | 2795       |        |
| C17               | RFN       | 150               | Weeks 0, 4, 8         | 11006                                    | 28251   | 6293    | 27203   | 5005    | 325    | 2198    | 1221       |        |
| RFN 150mg         |           |                   |                       | GMT                                      | 10595.2 | 13277.0 | 3893.7  | 17313.7 | 3087.2 | 511.1   | 1268.9     | 1311.5 |
| C18               | RFN       | 500               | Weeks 0, 3, 6         | 21123                                    | 32553   | 11770   | 12815   | 4160    | 467    | 984     | 3675       |        |
| C19               | RFN       | 500               | Weeks 0, 4, 8         | 35436                                    | 47894   | 28759   | 33367   | 14342   | 946    | 7511    | 8157       |        |
| C20               | RFN       | 500               | Weeks 0, 4, 8         | 13634                                    | 28483   | 15730   | 56120   | 10682   | 303    | 5113    | 3662       |        |
| RFN 500mg         |           |                   |                       | GMT                                      | 21690.7 | 35412.2 | 17462.0 | 28843.7 | 8605.7 | 511.5   | 3356.1     | 4788.2 |
| total             |           |                   |                       | GMT                                      | 19929.7 | 20356.3 | 7917.8  | 20854.6 | 5170.7 | 575.6   | 1755.6     | 2535.6 |
